# Supplementary material
Source: PubMed Central journal article supplement (PMC3873112)
Supplement: supp_kwt254_kwt254supp.pdf [file supp_kwt254_kwt254supp.pdf]

## **WEB MATERIAL**

### **Body Mass and Weight Change in Adults in Relation to Mortality Risk**

Kenneth F. Adams\*, Michael F. Leitzmann, Rachel Ballard-Barbash, Demetrius Albanes, Tamara B. Harris, Albert Hollenbeck, and Victor Kipnis

\*Correspondence to Dr. Kenneth F. Adams, Minnesota Cancer Surveillance System, Minnesota Department of Health, 185 East 7th Place, P.O. Box 64882, St. Paul, MN 55164-0882 (e-mail: [kenneth.adams@state.mn.us](mailto:kenneth.adams@state.mn.us)).

**Web Table 1.** Cause-Specific Mortality Risk Among Never Smokers in Relation to Body Mass Index<sup>a</sup> at Ages 18, 35, and 50 Years, National Institutes of Health-AARP Diet and Health Study, 1996–2009

|                          | Cause of Death             |                    |            |                              |                        |       |            |                 |               |       |            |                 |               |       |            |                 |
|--------------------------|----------------------------|--------------------|------------|------------------------------|------------------------|-------|------------|-----------------|---------------|-------|------------|-----------------|---------------|-------|------------|-----------------|
|                          | Cancer                     |                    |            |                              | Cardiovascular Disease |       |            |                 | Stroke        |       |            |                 | Other Causes  |       |            |                 |
|                          | No. of Deaths <sup>b</sup> | MV HR <sup>c</sup> | 95% CI     | <i>P</i> -trend <sup>d</sup> | No. of Deaths          | MV HR | 95% CI     | <i>P</i> -trend | No. of Deaths | MV HR | 95% CI     | <i>P</i> -trend | No. of Deaths | MV HR | 95% CI     | <i>P</i> -trend |
| BMI at age 18 years      | 3,458                      |                    |            | 0.001                        | 2,567                  |       |            | <0.0005         | 505           |       |            | 0.003           | 2,723         |       |            | <0.0005         |
| <18.5                    |                            | 1.08               | 0.99, 1.19 |                              |                        | 0.91  | 0.81, 1.04 |                 |               | 1.18  | 0.92, 1.51 |                 |               | 1.08  | 0.96, 1.21 |                 |
| 18.5–<22.5               |                            | 1.0                | Referent   |                              |                        | 1.0   | Referent   |                 |               | 1.0   | Referent   |                 |               | 1.0   | Referent   |                 |
| 22.5–<25                 |                            | 1.09               | 0.99, 1.19 |                              |                        | 1.34  | 1.21, 1.48 |                 |               | 1.30  | 1.03, 1.65 |                 |               | 1.16  | 1.04, 1.29 |                 |
| 25–<27.5                 |                            | 1.27               | 1.12, 1.44 |                              |                        | 1.65  | 1.44, 1.88 |                 |               | 1.43  | 1.02, 1.99 |                 |               | 1.49  | 1.30, 1.71 |                 |
| ≥27.5                    |                            | 1.33               | 1.11, 1.59 |                              |                        | 2.42  | 2.06, 2.84 |                 |               | 1.98  | 1.31, 2.98 |                 |               | 2.66  | 2.29, 3.09 |                 |
| BMI at age 35 years      | 3,542                      |                    |            | <0.0005                      | 2,564                  |       |            | <0.0005         | 517           |       |            | <0.0005         | 2,758         |       |            | <0.0005         |
| <18.5                    |                            | 0.96               | 0.76, 1.21 |                              |                        | 1.03  | 0.76, 1.41 |                 |               | 1.36  | 0.81, 2.26 |                 |               | 1.24  | 0.98, 1.59 |                 |
| 18.5–<22.5               |                            | 1.0                | Referent   |                              |                        | 1.0   | Referent   |                 |               | 1.0   | Referent   |                 |               | 1.0   | Referent   |                 |
| 22.5–<25                 |                            | 1.09               | 1.00, 1.19 |                              |                        | 1.15  | 1.03, 1.29 |                 |               | 0.94  | 0.74, 1.18 |                 |               | 1.01  | 0.91, 1.11 |                 |
| 25–<27.5                 |                            | 1.10               | 1.00, 1.22 |                              |                        | 1.51  | 1.34, 1.69 |                 |               | 1.09  | 0.84, 1.41 |                 |               | 1.25  | 1.12, 1.40 |                 |
| 27.5–<30                 |                            | 1.36               | 1.19, 1.56 |                              |                        | 2.58  | 2.25, 2.96 |                 |               | 1.58  | 1.12, 2.22 |                 |               | 1.51  | 1.30, 1.76 |                 |
| ≥30                      |                            | 1.58               | 1.38, 1.82 |                              |                        | 3.06  | 2.66, 3.53 |                 |               | 2.25  | 1.63, 3.10 |                 |               | 2.69  | 2.36, 3.07 |                 |
| BMI at age 50 years      | 3,562                      |                    |            | <0.0005                      | 2,619                  |       |            | <0.0005         | 526           |       |            | <0.0005         | 2,796         |       |            | <0.0005         |
| <18.5                    |                            | 1.03               | 0.73, 1.45 |                              |                        | 1.66  | 1.11, 2.47 |                 |               | 1.13  | 0.50, 2.58 |                 |               | 2.04  | 1.49, 2.78 |                 |
| 18.5–<22.5               |                            | 1.0                | Referent   |                              |                        | 1.0   | Referent   |                 |               | 1.0   | Referent   |                 |               | 1.0   | Referent   |                 |
| 22.5–<25                 |                            | 1.04               | 0.94, 1.15 |                              |                        | 1.10  | 0.96, 1.27 |                 |               | 0.84  | 0.64, 1.09 |                 |               | 1.11  | 0.99, 1.26 |                 |
| 25–<27.5                 |                            | 1.11               | 1.00, 1.23 |                              |                        | 1.36  | 1.19, 1.56 |                 |               | 1.03  | 0.79, 1.34 |                 |               | 1.18  | 1.05, 1.34 |                 |
| 27.5–<30                 |                            | 1.23               | 1.08, 1.39 |                              |                        | 1.94  | 1.67, 2.26 |                 |               | 1.12  | 0.81, 1.54 |                 |               | 1.43  | 1.24, 1.66 |                 |
| 30–<32.4                 |                            | 1.51               | 1.31, 1.74 |                              |                        | 2.52  | 2.14, 2.97 |                 |               | 1.34  | 0.92, 1.95 |                 |               | 1.93  | 1.64, 2.26 |                 |
| ≥32.5                    |                            | 1.60               | 1.38, 1.84 |                              |                        | 4.16  | 3.58, 4.83 |                 |               | 2.15  | 1.55, 2.98 |                 |               | 2.89  | 2.51, 3.34 |                 |
| Average BMI <sup>e</sup> | 3,334                      |                    |            | <0.0005                      | 2,426                  |       |            | <0.0005         | 481           |       |            | <0.0005         | 2,571         |       |            | <0.0005         |

|            |      |            |      |            |      |            |      |            |
|------------|------|------------|------|------------|------|------------|------|------------|
| <18.5      | 1.08 | 0.82, 1.43 | 1.30 | 0.90, 1.86 | 1.30 | 0.66, 2.54 | 1.48 | 1.10, 1.98 |
| 18.5–<22.5 | 1.0  | Referent   | 1.0  | Referent   | 1.0  | Referent   | 1.0  | Referent   |
| 22.5–<25   | 1.06 | 0.98, 1.16 | 1.19 | 1.07, 1.33 | 0.97 | 0.77, 1.22 | 1.07 | 0.96, 1.18 |
| 25–<27.5   | 1.14 | 1.03, 1.26 | 1.71 | 1.52, 1.93 | 1.11 | 0.84, 1.45 | 1.35 | 1.20, 1.51 |
| 27.5–<30   | 1.43 | 1.25, 1.64 | 2.74 | 2.38, 3.15 | 1.91 | 1.39, 2.64 | 1.80 | 1.55, 2.08 |
| ≥30        | 1.56 | 1.31, 1.84 | 3.70 | 3.17, 4.32 | 2.12 | 1.43, 3.15 | 3.26 | 2.81, 3.78 |

---

Abbreviations: BMI, body mass index; CI, confidence interval; MV HR, multivariate hazard ratio.

<sup>a</sup>Weight (kg)/height (m)<sup>2</sup>.

<sup>b</sup>Subjects with missing data on cause of death were not included in cause-specific analyses.

<sup>c</sup>All regression analyses adjusted for age (in the baseline hazard of the Cox regression) and the following covariates: gender, race/ethnicity, education, and leisure-time physical activity (see text Table 3 for definitions).

<sup>d</sup>Statistical significance of the linear trend in BMI categories, evaluated using BMI category medians.

<sup>e</sup>Average BMI was calculated as the weighted average of BMIs at 18, 35, and 50 years of age.

**Web Table 2.** Cause-specific Mortality Risk Among Never Smokers in Relation to Weight Change During 3 Age Intervals, National Institutes of Health-AARP Diet and Health Study, 1996–2009

| Age Interval and Weight Change, kg/year | Cause of Death |                    |            |                              |                        |       |            |                 |               |       |            |                 |               |       |            |                 |         |
|-----------------------------------------|----------------|--------------------|------------|------------------------------|------------------------|-------|------------|-----------------|---------------|-------|------------|-----------------|---------------|-------|------------|-----------------|---------|
|                                         | Cancer         |                    |            |                              | Cardiovascular Disease |       |            |                 | Stroke        |       |            |                 | Other Causes  |       |            |                 |         |
|                                         | No. of Deaths  | MV HR <sup>a</sup> | 95% CI     | <i>P</i> -trend <sup>b</sup> | No. of Deaths          | MV HR | 95% CI     | <i>P</i> -trend | No. of Deaths | MV HR | 95% CI     | <i>P</i> -trend | No. of Deaths | MV HR | 95% CI     | <i>P</i> -trend |         |
| 18–35 years                             | 3,384          |                    |            | <0.0005                      | 2,468                  |       |            | <0.0005         | 489           |       |            |                 | 0.006         | 2,629 |            |                 | <0.0005 |
| Loss of >0.2                            |                | 1.01               | 0.83, 1.21 |                              |                        | 0.68  | 0.52, 0.88 |                 |               | 0.90  | 0.55, 1.46 |                 |               | 0.89  | 0.72, 1.10 |                 |         |
| Stable (±0.2)                           |                | 1.0                | Referent   |                              |                        | 1.0   | Referent   |                 |               | 1.0   | Referent   |                 |               | 1.0   | Referent   |                 |         |
| Gain of >0.2–0.6                        |                | 1.08               | 0.99, 1.19 |                              |                        | 1.23  | 1.10, 1.39 |                 |               | 0.92  | 0.73, 1.17 |                 |               | 1.02  | 0.91, 1.13 |                 |         |
| Gain of >0.6–1                          |                | 1.18               | 1.05, 1.32 |                              |                        | 1.47  | 1.28, 1.68 |                 |               | 1.03  | 0.77, 1.38 |                 |               | 1.23  | 1.08, 1.39 |                 |         |
| Gain of >1                              |                | 1.37               | 1.21, 1.56 |                              |                        | 2.10  | 1.82, 2.42 |                 |               | 1.51  | 1.10, 2.06 |                 |               | 1.73  | 1.51, 1.98 |                 |         |
| 35–50 years                             | 3,486          |                    |            | <0.0005                      | 2,520                  |       |            | <0.0005         | 506           |       |            |                 | 0.07          | 2,698 |            |                 | <0.0005 |
| Loss of >0.2                            |                | 1.03               | 0.90, 1.19 |                              |                        | 1.11  | 0.95, 1.31 |                 |               | 0.99  | 0.68, 1.44 |                 |               | 1.13  | 0.97, 1.31 |                 |         |
| Stable (±0.2)                           |                | 1.0                | Referent   |                              |                        | 1.0   | Referent   |                 |               | 1.0   | Referent   |                 |               | 1.0   | Referent   |                 |         |
| Gain of >0.2–0.6                        |                | 1.04               | 0.96, 1.13 |                              |                        | 1.24  | 1.12, 1.38 |                 |               | 0.97  | 0.78, 1.21 |                 |               | 0.91  | 0.82, 1.00 |                 |         |
| Gain of >0.6–1                          |                | 1.13               | 1.02, 1.24 |                              |                        | 1.44  | 1.28, 1.62 |                 |               | 1.21  | 0.94, 1.55 |                 |               | 1.10  | 0.98, 1.23 |                 |         |
| Gain of >1                              |                | 1.32               | 1.16, 1.50 |                              |                        | 2.08  | 1.81, 2.38 |                 |               | 1.24  | 0.88, 1.73 |                 |               | 1.76  | 1.55, 2.00 |                 |         |
| 50–69 years                             | 3,507          |                    |            | 0.54                         | 2,560                  |       |            | 0.003           | 511           |       |            |                 | 0.72          | 2,743 |            |                 | 0.04    |
| Loss of >0.2                            |                | 1.12               | 1.01, 1.24 |                              |                        | 1.51  | 1.35, 1.69 |                 |               | 1.26  | 0.96, 1.64 |                 |               | 1.71  | 1.53, 1.90 |                 |         |
| Stable (±0.2)                           |                | 1.0                | Referent   |                              |                        | 1.0   | Referent   |                 |               | 1.0   | Referent   |                 |               | 1.0   | Referent   |                 |         |
| Gain of >0.2–0.6                        |                | 0.94               | 0.86, 1.02 |                              |                        | 0.90  | 0.81, 1.00 |                 |               | 0.80  | 0.64, 1.01 |                 |               | 0.88  | 0.80, 0.98 |                 |         |
| Gain of >0.6–1                          |                | 1.01               | 0.90, 1.13 |                              |                        | 1.05  | 0.92, 1.21 |                 |               | 1.09  | 0.82, 1.44 |                 |               | 1.01  | 0.88, 1.15 |                 |         |
| Gain of >1                              |                | 1.02               | 0.90, 1.16 |                              |                        | 1.21  | 1.05, 1.39 |                 |               | 0.86  | 0.61, 1.21 |                 |               | 1.16  | 1.01, 1.33 |                 |         |

Abbreviations: CI, confidence interval; MV HR, multivariate hazard ratio.

<sup>a</sup>All regression analyses adjusted for age (in the baseline hazard of the Cox regression) and the following covariates: gender, race/ethnicity, education, physical activity, alcohol consumption, body mass index at the beginning of the age interval (weight (kg)/height (m)<sup>2</sup>; categorical), and height (inches, in quintiles). (For additional definitions, see text Table 3.)

<sup>b</sup>Statistical significance of the linear trend in weight-gain categories, evaluated using weight-gain category medians.



**Web Table 3.** Cause-Specific Mortality Risk Among Never Smokers in Relation to Combined Initial Body Mass Index<sup>a</sup> and Weight Change During 3 Age Intervals, National Institutes of Health Diet and Health Study, 1996–2009

| Age Interval and Weight Change, kg/year | Cause of Death |                 |                              |       |                 |                 |       |                        |                 |                 |            |                 |                 |  |
|-----------------------------------------|----------------|-----------------|------------------------------|-------|-----------------|-----------------|-------|------------------------|-----------------|-----------------|------------|-----------------|-----------------|--|
|                                         | Cancer         |                 |                              |       |                 |                 |       | Cardiovascular Disease |                 |                 |            |                 |                 |  |
|                                         | No. of Deaths  | Initial BMI <25 |                              |       | Initial BMI ≥25 |                 |       | No. of Deaths          | Initial BMI <25 |                 |            | Initial BMI ≥25 |                 |  |
| MV HR <sup>b</sup>                      |                | 95% CI          | <i>P</i> -trend <sup>c</sup> | MV HR | 95% CI          | <i>P</i> -trend | MV HR |                        | 95% CI          | <i>P</i> -trend | MV HR      | 95% CI          | <i>P</i> -trend |  |
| 18–35 years                             | 2,860          |                 | <0.0005                      |       |                 | 0.04            | 2,174 |                        |                 | <0.0005         |            |                 | <0.0005         |  |
| Loss of >0.2                            |                | 1.13            | 0.89, 1.45                   | 1.18  | 0.92, 1.51      |                 |       | 0.60                   | 0.38, 0.95      | 1.48            | 1.10, 1.98 |                 |                 |  |
| Stable (±0.2)                           |                | 1.0             | Referent                     | 1.12  | 0.88, 1.43      |                 |       | 1.0                    | Referent        | 1.77            | 1.38, 2.27 |                 |                 |  |
| Gain of >0.2–0.6                        |                | 1.05            | 0.95, 1.17                   | 1.59  | 1.31, 1.92      |                 |       | 1.18                   | 1.03, 1.35      | 2.15            | 1.75, 2.65 |                 |                 |  |
| Gain of >0.6–1                          |                | 1.14            | 1.01, 1.30                   | 1.54  | 1.19, 2.00      |                 |       | 1.40                   | 1.20, 1.63      | 2.54            | 1.97, 3.27 |                 |                 |  |
| Gain of >1                              |                | 1.35            | 1.16, 1.56                   | 1.66  | 1.21, 2.27      |                 |       | 2.03                   | 1.72, 2.40      | 3.53            | 2.69, 4.63 |                 |                 |  |
| 35–50 years                             | 3,415          |                 | 0.002                        |       |                 | <0.0005         | 2,479 |                        |                 | <0.0005         |            |                 | <0.0005         |  |
| Loss of >0.2                            |                | 1.14            | 0.91, 1.44                   | 1.24  | 1.05, 1.46      |                 |       | 1.37                   | 1.01, 1.85      | 2.07            | 1.72, 2.49 |                 |                 |  |
| Stable (±0.2)                           |                | 1.0             | Referent                     | 1.11  | 0.97, 1.26      |                 |       | 1.0                    | Referent        | 1.53            | 1.31, 1.79 |                 |                 |  |
| Gain of >0.2–0.6                        |                | 1.04            | 0.94, 1.15                   | 1.20  | 1.04, 1.37      |                 |       | 1.12                   | 0.98, 1.28      | 2.22            | 1.91, 2.57 |                 |                 |  |
| Gain of >0.6–1                          |                | 1.10            | 0.97, 1.24                   | 1.37  | 1.18, 1.60      |                 |       | 1.34                   | 1.14, 1.57      | 2.62            | 2.23, 3.08 |                 |                 |  |
| Gain of >1                              |                | 1.28            | 1.08, 1.51                   | 1.64  | 1.37, 1.97      |                 |       | 2.11                   | 1.74, 2.57      | 3.54            | 2.95, 4.25 |                 |                 |  |
| 50–69 years                             | 3,473          |                 | 0.65                         |       |                 | 0.48            | 2,535 |                        |                 | 0.63            |            |                 | <0.0005         |  |
| Loss of >0.2                            |                | 1.19            | 0.99, 1.43                   | 1.40  | 1.23, 1.59      |                 |       | 1.71                   | 1.37, 2.13      | 2.77            | 2.41, 3.18 |                 |                 |  |
| Stable (±0.2)                           |                | 1.0             | Referent                     | 1.19  | 1.07, 1.33      |                 |       | 1.0                    | Referent        | 1.53            | 1.34, 1.76 |                 |                 |  |
| Gain of >0.2–0.6                        |                | 0.95            | 0.84, 1.07                   | 1.10  | 0.97, 1.24      |                 |       | 0.82                   | 0.70, 0.97      | 1.44            | 1.24, 1.67 |                 |                 |  |
| Gain of >0.6–1                          |                | 0.94            | 0.79, 1.12                   | 1.28  | 1.10, 1.48      |                 |       | 0.91                   | 0.72, 1.17      | 1.76            | 1.48, 2.09 |                 |                 |  |
| Gain of >1                              |                | 1.06            | 0.87, 1.30                   | 1.23  | 1.06, 1.43      |                 |       | 1.06                   | 0.81, 1.40      | 2.12            | 1.79, 2.51 |                 |                 |  |

|                  | Cause of Death |                 |            |                 |                 |            |                 |               |                 |            |                 |                 |            |                 |
|------------------|----------------|-----------------|------------|-----------------|-----------------|------------|-----------------|---------------|-----------------|------------|-----------------|-----------------|------------|-----------------|
|                  | Stroke         |                 |            |                 |                 |            |                 | Other Causes  |                 |            |                 |                 |            |                 |
|                  | No. of Deaths  | Initial BMI <25 |            |                 | Initial BMI ≥25 |            |                 | No. of Deaths | Initial BMI <25 |            |                 | Initial BMI ≥25 |            |                 |
|                  |                | MV HR           | 95% CI     | <i>P</i> -trend | MV HR           | 95% CI     | <i>P</i> -trend |               | MV HR           | 95% CI     | <i>P</i> -trend | MV HR           | 95% CI     | <i>P</i> -trend |
| 18–35 years      | 409            |                 |            | 0.001           |                 |            | 0.77            | 2,249         |                 |            | <0.0005         |                 |            | <0.0005         |
| Loss of >0.2     |                | 1.18            | 0.63, 2.22 |                 | 1.30            | 0.69, 2.44 |                 |               | 1.14            | 0.85, 1.54 |                 | 1.62            | 1.25, 2.11 |                 |
| Stable (±0.2)    |                | 1.0             | Referent   |                 | 1.50            | 0.86, 2.62 |                 |               | 1.0             | Referent   |                 | 1.79            | 1.42, 2.27 |                 |
| Gain of >0.2–0.6 |                | 0.86            | 0.65, 1.13 |                 | 1.66            | 1.02, 2.68 |                 |               | 1.03            | 0.91, 1.16 |                 | 1.76            | 1.43, 2.18 |                 |
| Gain of >0.6–1   |                | 1.02            | 0.73, 1.44 |                 | 0.63            | 0.23, 1.73 |                 |               | 1.19            | 1.03, 1.38 |                 | 2.05            | 1.58, 2.67 |                 |
| Gain of >1       |                | 1.73            | 1.21, 2.47 |                 | 2.65            | 1.36, 5.17 |                 |               | 1.67            | 1.42, 1.97 |                 | 3.56            | 2.74, 4.61 |                 |
| 35–50 years      | 490            |                 |            | 0.06            |                 |            | 0.41            | 2,632         |                 |            | <0.0005         |                 |            | <0.0005         |
| Loss of >0.2     |                | 1.26            | 0.68,2.35  |                 | 1.52            | 0.99,2.35  |                 |               | 1.16            | 0.87, 1.54 |                 | 1.90            | 1.60, 2.25 |                 |
| Stable (±0.2)    |                | 1.0             | Referent   |                 | 1.51            | 1.08,2.10  |                 |               | 1.0             | Referent   |                 | 1.43            | 1.24, 1.65 |                 |
| Gain of >0.2–0.6 |                | 0.95            | 0.72,1.25  |                 | 1.42            | 1.00,2.02  |                 |               | 0.94            | 0.83, 1.06 |                 | 1.24            | 1.06, 1.45 |                 |
| Gain of >0.6–1   |                | 1.32            | 0.97,1.81  |                 | 1.59            | 1.07,2.36  |                 |               | 1.10            | 0.95, 1.28 |                 | 1.69            | 1.43, 1.99 |                 |
| Gain of >1       |                | 1.29            | 0.82,2.04  |                 | 1.92            | 1.20,3.07  |                 |               | 1.88            | 1.58, 2.24 |                 | 2.75            | 2.31, 3.28 |                 |
| 50–69 years      | 505            |                 |            | 0.61            |                 |            | 0.51            | 2,703         |                 |            | 0.35            |                 |            | 0.01            |
| Loss of >0.2     |                | 0.88            | 0.49,1.57  |                 | 2.01            | 1.47,2.74  |                 |               | 1.97            | 1.63, 2.38 |                 | 2.40            | 2.10, 2.73 |                 |
| Stable (±0.2)    |                | 1.0             | Referent   |                 | 1.30            | 0.97,1.74  |                 |               | 1.0             | Referent   |                 | 1.25            | 1.10, 1.43 |                 |
| Gain of >0.2–0.6 |                | 0.80            | 0.58,1.10  |                 | 1.05            | 0.76,1.45  |                 |               | 0.83            | 0.72, 0.97 |                 | 1.15            | 1.00, 1.32 |                 |
| Gain of >0.6–1   |                | 1.34            | 0.90,2.00  |                 | 1.21            | 0.82,1.79  |                 |               | 0.93            | 0.75, 1.15 |                 | 1.37            | 1.15, 1.62 |                 |
| Gain of >1       |                | 0.91            | 0.52,1.61  |                 | 1.16            | 0.77,1.77  |                 |               | 1.11            | 0.87, 1.41 |                 | 1.61            | 1.36, 1.90 |                 |

Abbreviations: BMI, body mass index; CI, confidence interval; MV HR, multivariate hazard ratio.

<sup>a</sup>Weight (kg)/height (m)<sup>2</sup>.

<sup>b</sup>All regression analyses adjusted for age (in the baseline hazard of the Cox regression) and the following covariates: gender, race/ethnicity, education, physical activity, alcohol consumption, and height (see text Tables 3 and 4 for definitions). The analyses did not include subjects with an initial BMI less than 18.5.

<sup>c</sup>Statistical significance of the linear trend in weight-gain categories, evaluated using weight-gain category medians.
